# Supplementary material
Source: Royal Society of Chemistry journal article supplement (doi:10.1039/d6nh00200e)
Supplement: d6nh00200e1.pdf [file d6nh00200e1.pdf]

*Supplementary Information*

**Regulating Surface Oxygen Species on Activated Carbon via Plasma Treatment to Boost Zinc-ion Adsorption for Zinc-ion Hybrid Capacitors**

Yongxia Zhang, Xuchao Yang, Xupeng Liu, Yunlong Yang\*, Fen Ran\*

*Energy Storage Institute, State Key Laboratory of Advanced Processing and Recycling of Non-ferrous Metals, School of Material Science and Engineering, Lanzhou University of Technology, School of Green Energy and Energy Storage, Lanzhou 730050, China*

*Corresponding Authors: Dr. Assistant Prof. Yunlong Yang ([ylyang@lut.edu.cn](mailto:ylyang@lut.edu.cn)); or Dr. Prof. Fen Ran ([ranfen@lut.edu.cn](mailto:ranfen@lut.edu.cn))*

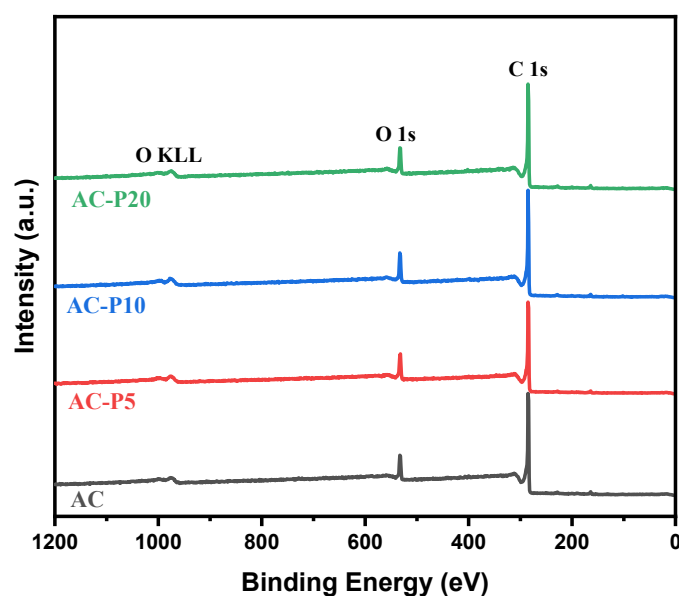

**Figure S1.** XPS full spectra of AC, AC-P5, AC-P10, and AC-P20.

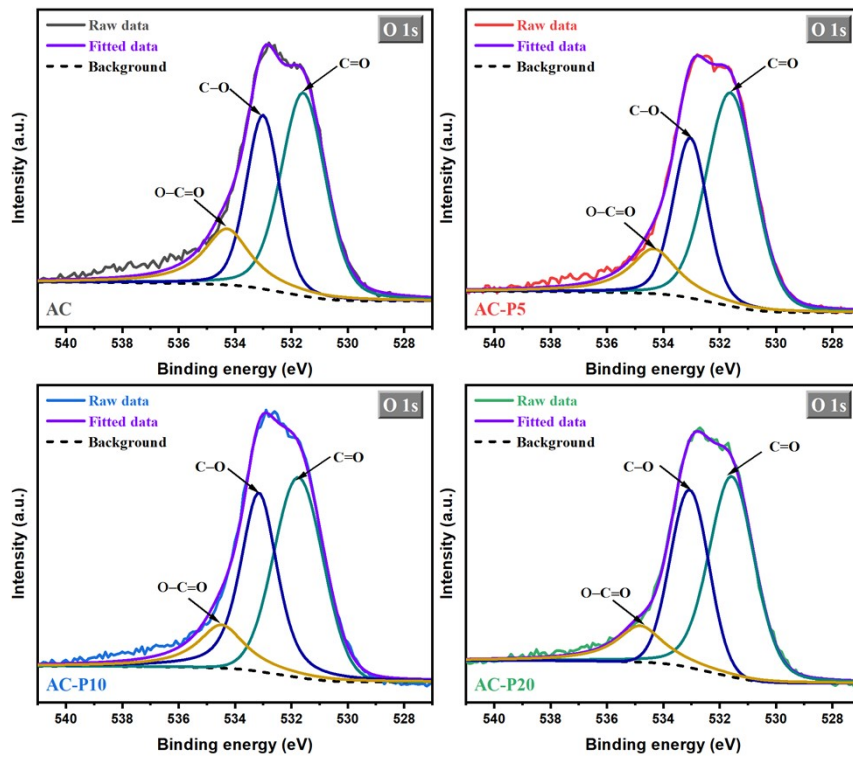

**Figure S2.** O 1s spectra of AC, AC-P5, AC-P10, and AC-P20.

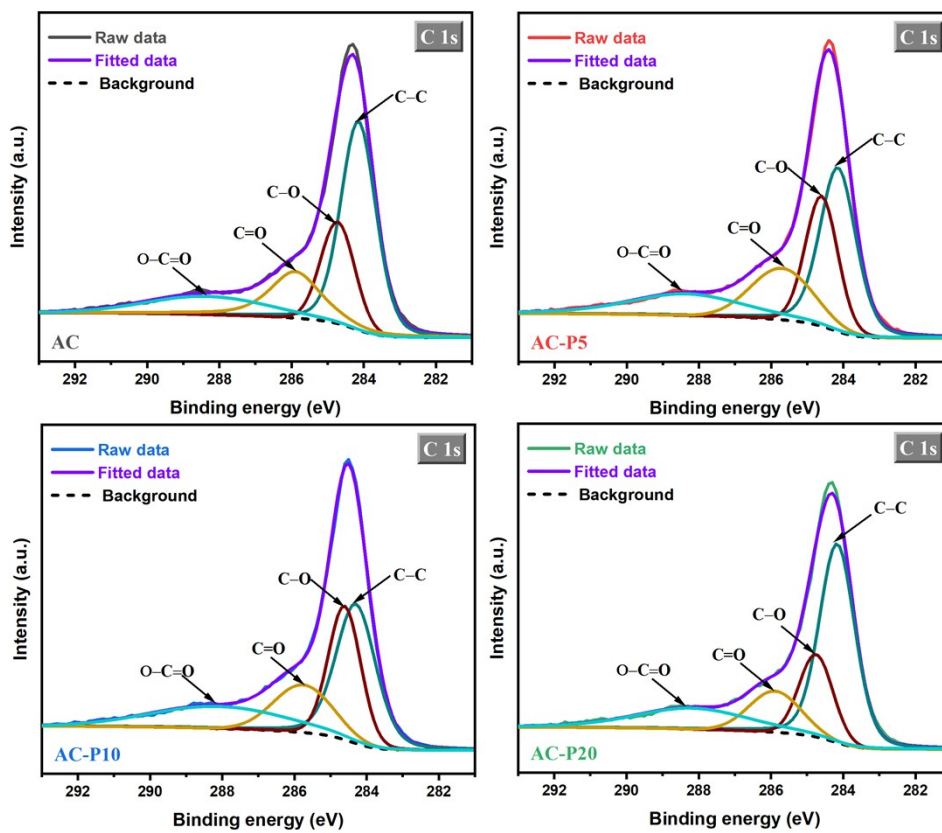

**Figure S3.** C 1s spectra of AC, AC-P5, AC-P10, and AC-P20.

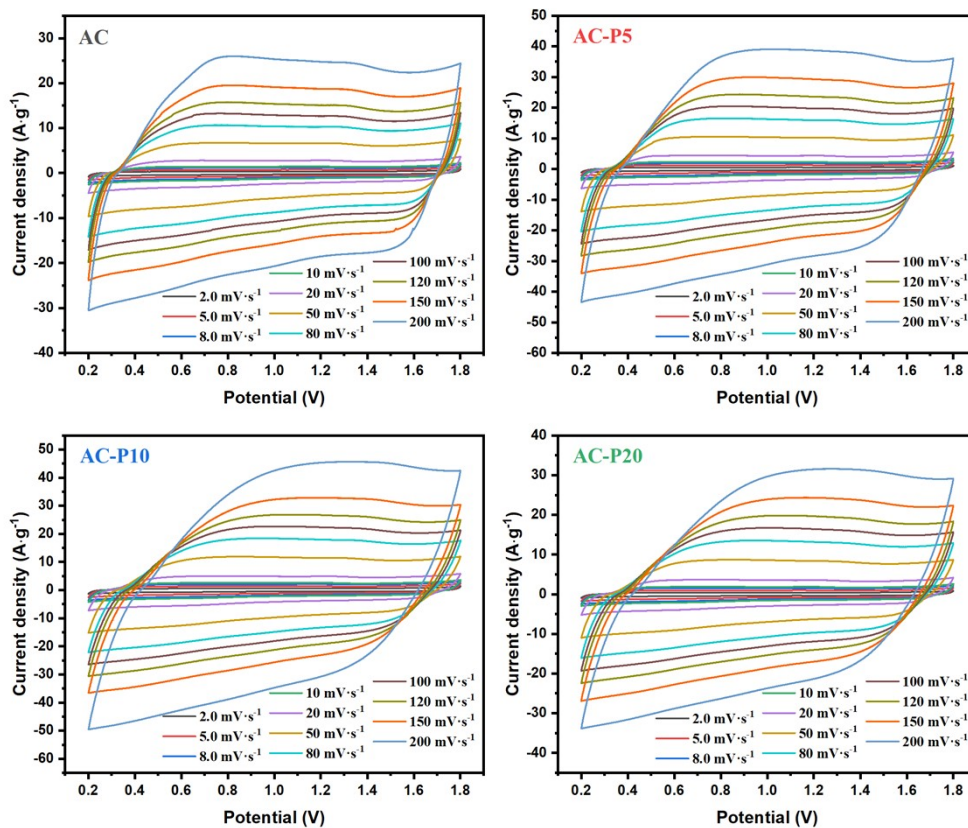

Figure S4. CV curves of AC, AC-P5, AC-P10, and AC-P20 electrodes at different scan rates.

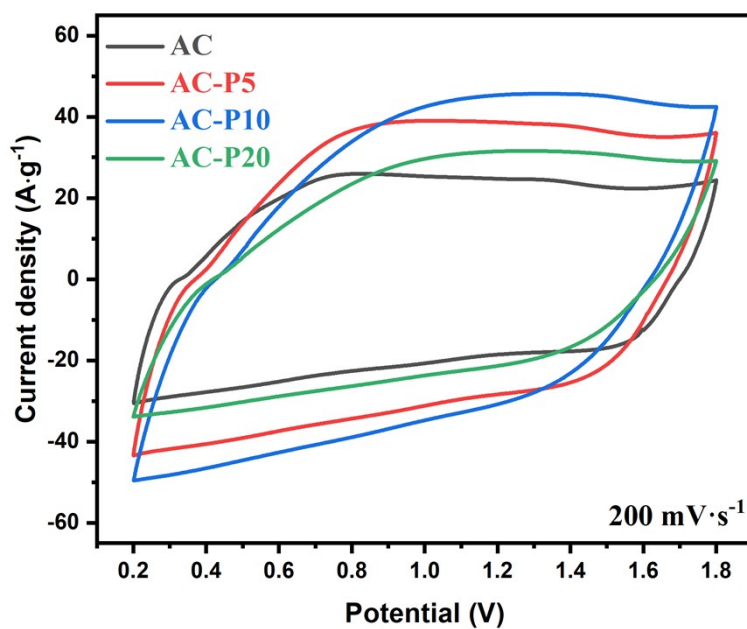

Figure S5. CV curves of AC, AC-P5, AC-P10, and AC-P20 electrodes at 200  $\text{mV}\cdot\text{s}^{-1}$ .

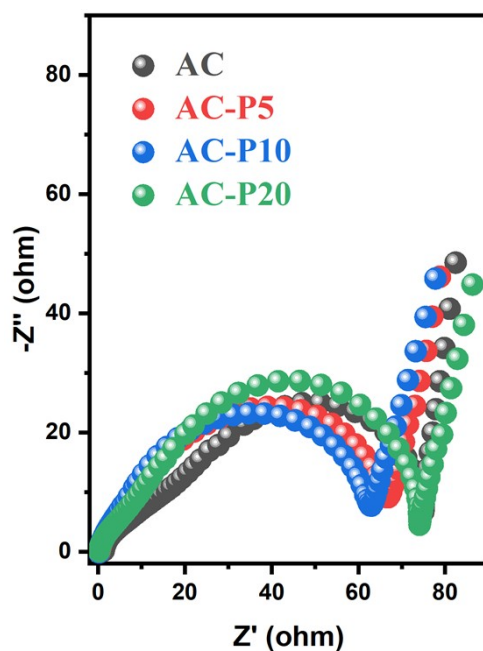

**Figure S6.** EIS plots of AC, AC-P5, AC-P10, and AC-P20 electrodes, inset shows the equivalent circuit model of all EIS plots.

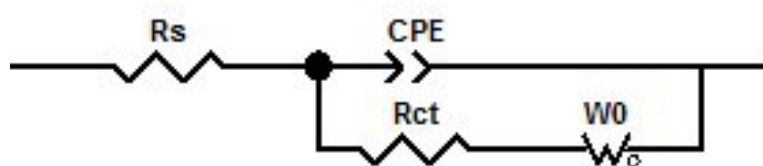

**Figure S7.** The equivalent electrical circuit model of EIS plots.

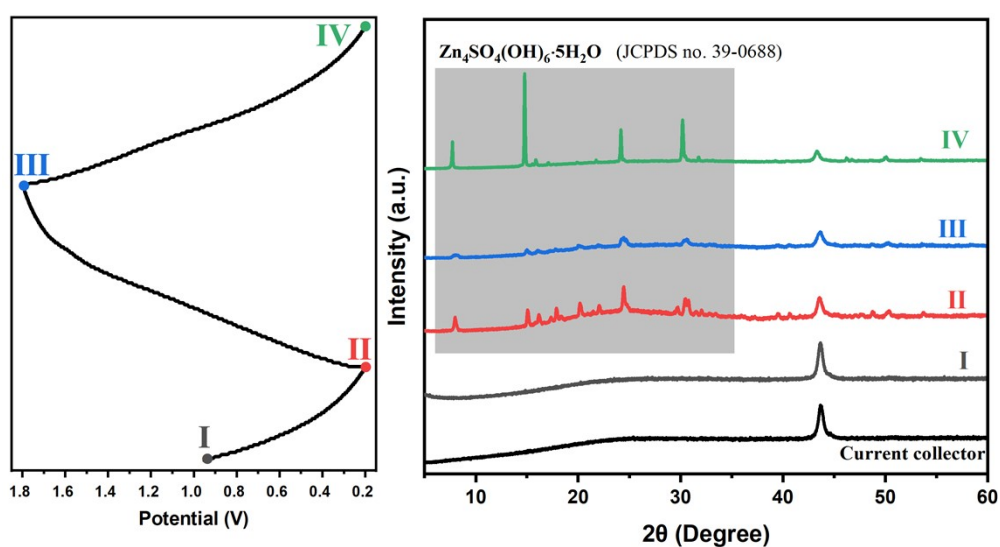

**Figure S8.** Different states of AC-P10 during charging and discharging, and ex-situ XRD patterns of different states of AC-P10 electrode.

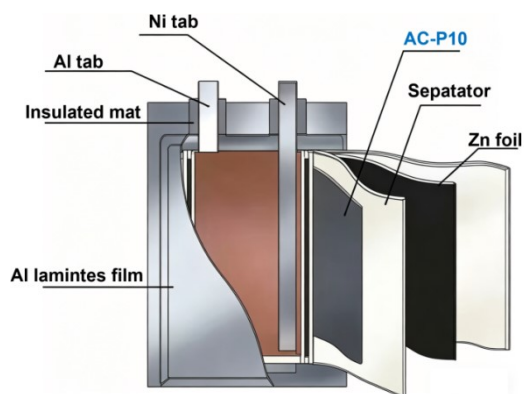

**Figure S9.** Schematic diagram of the constructed pouch full cell.

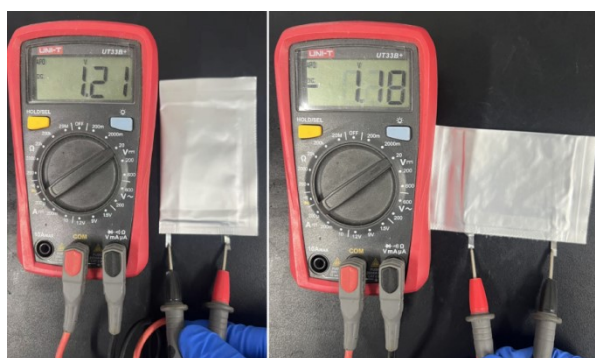

**Figure S10.** Open-circuit voltage of one pouch cell.

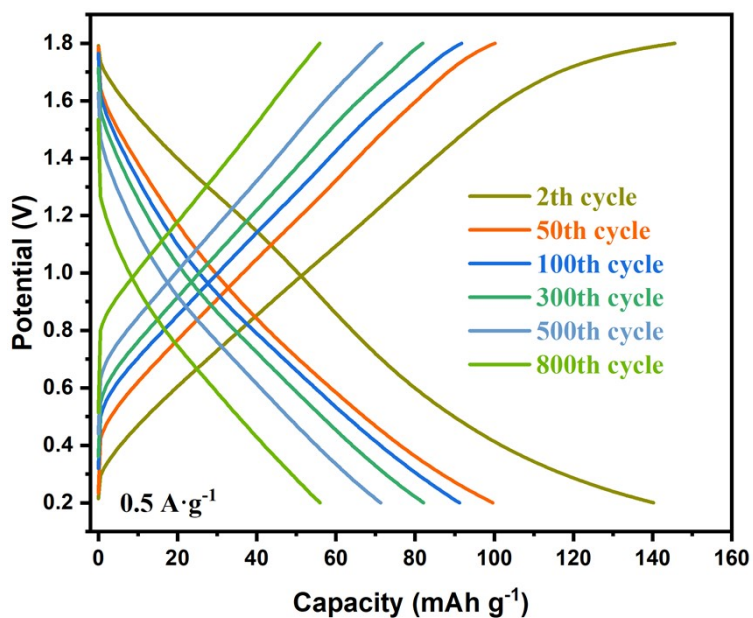

**Figure S11.** GCD curves of pouch cell under different cycles at  $0.5 \text{ A} \cdot \text{g}^{-1}$ .

**Table S1.** The element atomic concentration (%) of AC, AC-P5, AC-P10, and AC-P20

from XPS spectra

| Sample | Contents (at%) |       |
|--------|----------------|-------|
|        | C 1s           | O 1s  |
| AC     | 89.14          | 10.86 |
| AC-P5  | 88.13          | 11.87 |
| AC-P10 | 86.28          | 13.72 |
| AC-P20 | 88.59          | 11.41 |

**Table S2.** Fitted parameters for EIS plots

| Sample | $R_s$ ( $\Omega$ ) | $R_{ct}$ ( $\Omega$ ) | $R_w$ ( $\Omega$ ) |
|--------|--------------------|-----------------------|--------------------|
| AC     | 2.7                | 71.3                  | 0.38               |
| AC-P5  | 3.2                | 63.8                  | 0.41               |
| AC-P10 | 3.7                | 59.6                  | 0.48               |
| AC-P20 | 3.3                | 70.8                  | 0.44               |

**Table S3.** Comparison of the AC-P10 electrode performance with previous reports on carbon cathode materials

| Concept              | Capacity ( $\text{mAh}\cdot\text{g}^{-1}$ )                                                           | Ref.             | Year        |
|----------------------|-------------------------------------------------------------------------------------------------------|------------------|-------------|
| GPC-600              | 154.6 $\text{mAh}\cdot\text{g}^{-1}$ at 0.2 $\text{A}\cdot\text{g}^{-1}$                              | [1]              | 2026        |
| SA-3                 | 98.9 $\text{mAh}\cdot\text{g}^{-1}$ at 0.1 $\text{A}\cdot\text{g}^{-1}$                               | [2]              | 2024        |
| CNPK                 | 103.2 $\text{mAh}\cdot\text{g}^{-1}$ at 0.1 $\text{A}\cdot\text{g}^{-1}$                              | [3]              | 2021        |
| HPC-4                | 125.7 $\text{mAh}\cdot\text{g}^{-1}$ at 0.1 $\text{A}\cdot\text{g}^{-1}$                              | [4]              | 2023        |
| N-Macro/Meso/Micro-C | 155.4 $\text{mAh}\cdot\text{g}^{-1}$ at 0.2 $\text{A}\cdot\text{g}^{-1}$                              | [5]              | 2025        |
| <b>AC-P10</b>        | <b>171.3 <math>\text{mAh}\cdot\text{g}^{-1}</math> at 0.2 <math>\text{A}\cdot\text{g}^{-1}</math></b> | <b>This work</b> | <b>2026</b> |

## References

- [1] M. Liu, F. Liu, L. Hou, D. Han, L. Sheng, Z. Sun, X. Wu, X. Wang, Synthesis of nitrogen and oxygen co-doping porous carbon nanosheets for zinc-ion hybrid capacitors, *Journal of Energy Storage* 162 (2026) 122021.
- [2] X. Pan, Q. Li, T. Wang, T. Shu, Y. Tao, Controllable synthesis of electric double-layer capacitance and pseudocapitance coupled porous carbon cathode material for zinc-ion hybrid capacitors, *Nanoscale* 16(7) (2024) 3701-3713.
- [3] H. Zhang, Z. Chen, Y. Zhang, Z. Ma, Y. Zhang, L. Bai, L. Sun, Boosting Zn-ion adsorption in cross-linked N/P co-incorporated porous carbon nanosheets for the zinc-ion hybrid capacitor, *Journal*

of Materials Chemistry A 9(30) (2021) 16565-16574.

[4] F. Mo, Y. Wang, T. Song, X. Wu, Nitrogen and oxygen co-doped hierarchical porous carbon for zinc-ion hybrid capacitor, *Journal of Energy Storage* 72 (2023) 108228.

[5] Y. Wu, Y. Xu, M. Tang, Y. Qiao, C. Zhang, P. Ji, O. Klimova-Korsmik, M. Kurbanov, G. Wang, Pore and doping engineering of carbon cathodes for high-performance Zn-ion capacitors, *Microporous and Mesoporous Materials* 395 (2025) 113703.
